# Supplementary material
Source: Research Square preprint supplement (doi:10.21203/rs.3.rs-8880387/v1)
Supplement: Supplementary file 1 [file c516786384f65e6198d41c17.docx]

**Facile method for synthesis and polymerization of 1-allenyl-3-methyl- and 1-allenyl-5-methylpyrazoles**

L. A. Bichakhchyan, M. L. Petrosyan, N. A. Mirakyan*, R. M. Hakobyan, H. S. Attaryan

**Lilit Bichakhchyana,b (ORCID** [0000-0002-8713-3724](https://orcid.org/0000-0002-8713-3724))

**Maria Petrosyan (ORCID** [0009-0009-8248-5489](https://orcid.org/0009-0009-8248-5489))

**Nagharsh Mirakyan (ORCID** [0000-0001-8917-3327](https://orcid.org/0000-0001-8917-3327)**)**

**Robert Hakobyan (ORCID** [0000-0002-4318-3172](https://orcid.org/0000-0002-4318-3172)**)**

**Hovhannes Attaryan (ORCID** [0000-0001-9790-2577](https://orcid.org/0000-0001-9790-2577)**)**

*a Scientific and Technological Center of Organic and Pharmaceutical Chemistry, Azatutyan ave. 26, 0014, Yerevan. Republic of Armenia*

*b Eurasia International University, Azatutyan Ave., 24/2 Building, 0014, Yerevan, Republic of Armenia,*

E-mail: [lilitbichakhchyan@gmail.com](mailto:lilitbichakhchyan@gmail.com), [mariapetrosyan-3@aspu.am](mailto:mariapetrosyan-3@aspu.am), [nmiraqyan1@gmail.com](mailto:nmiraqyan1@gmail.com), [robahakob@gmail.com](mailto:robahakob@gmail.com), [hovelenatt@mail.ru](mailto:hovelenatt@mail.ru)


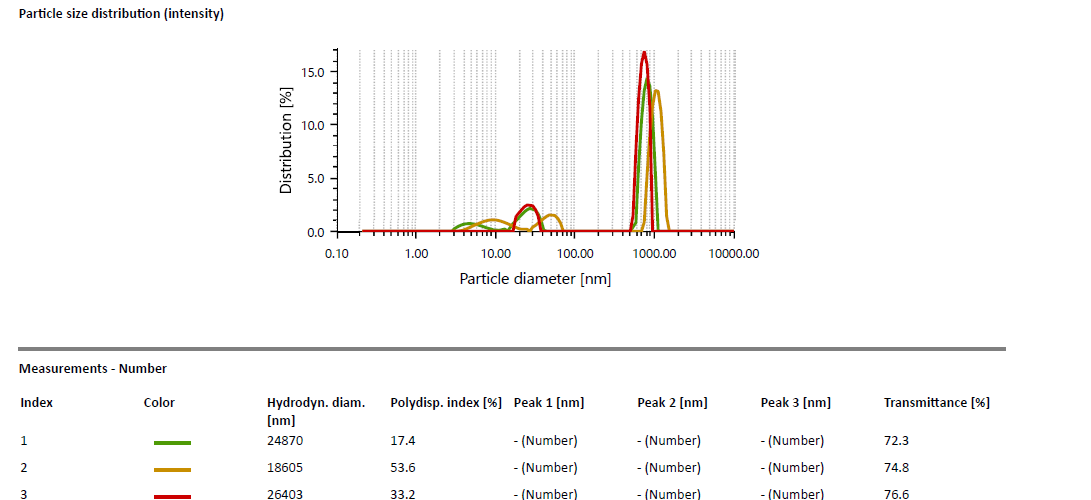


Fig. 2 PA-1 Ultrasonicated


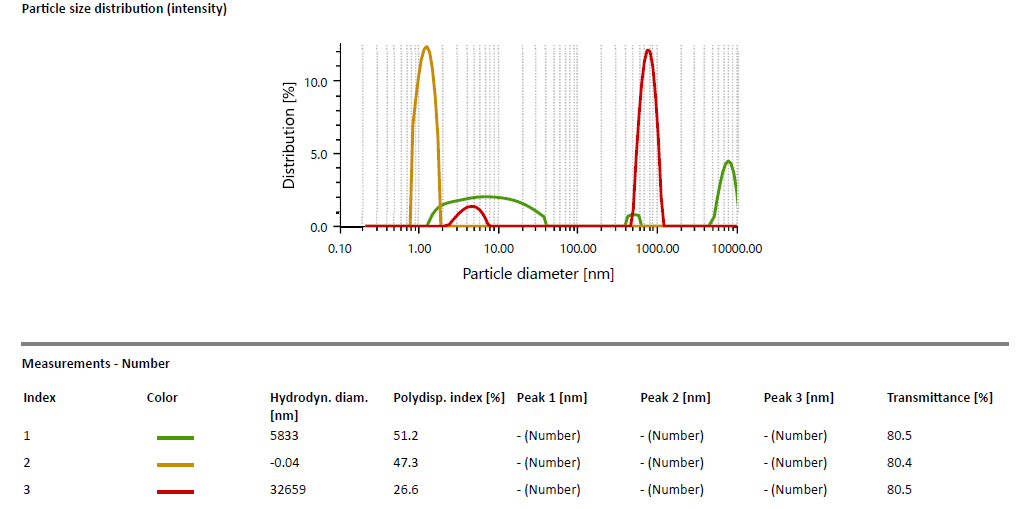


Fig. 3 PA-1 Ultrasonicated and filtered


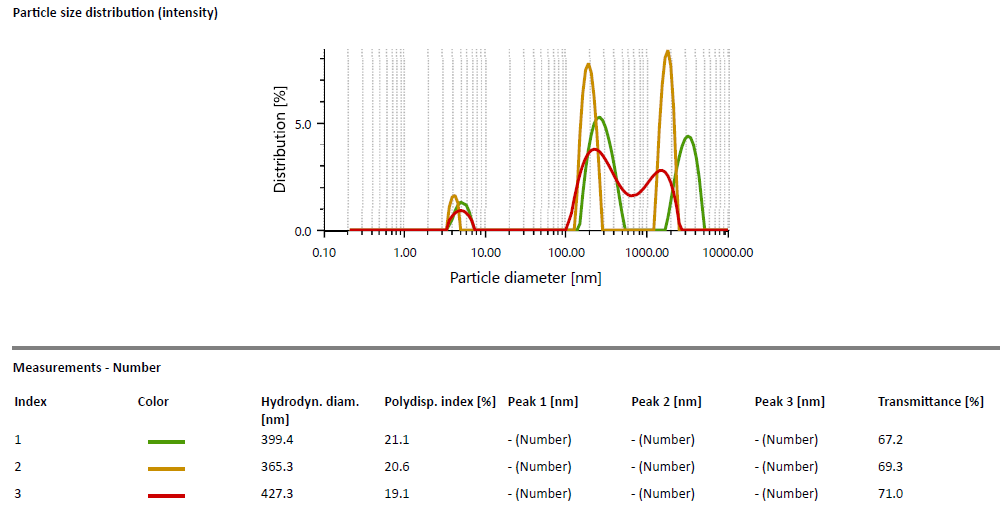


Fig.4 PA-2


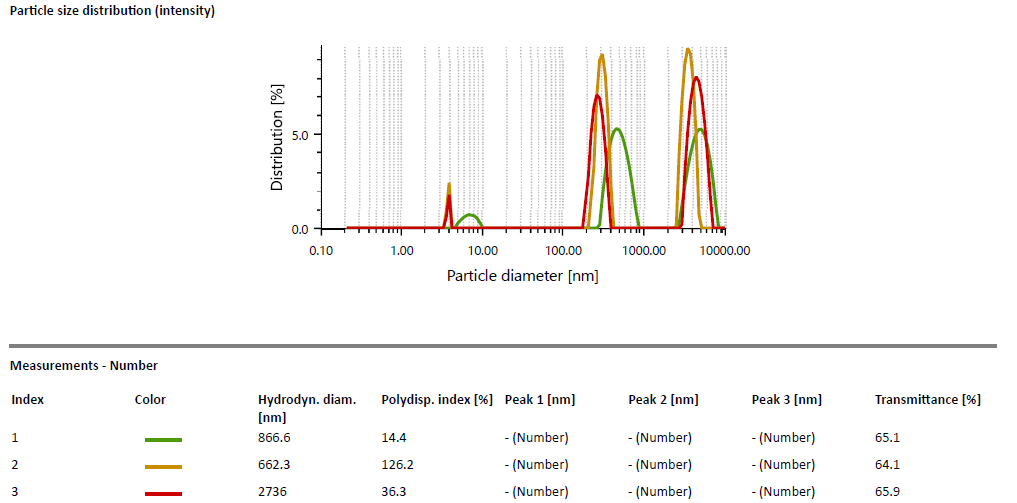


Fig.5 PA-2 Ultrasonicated


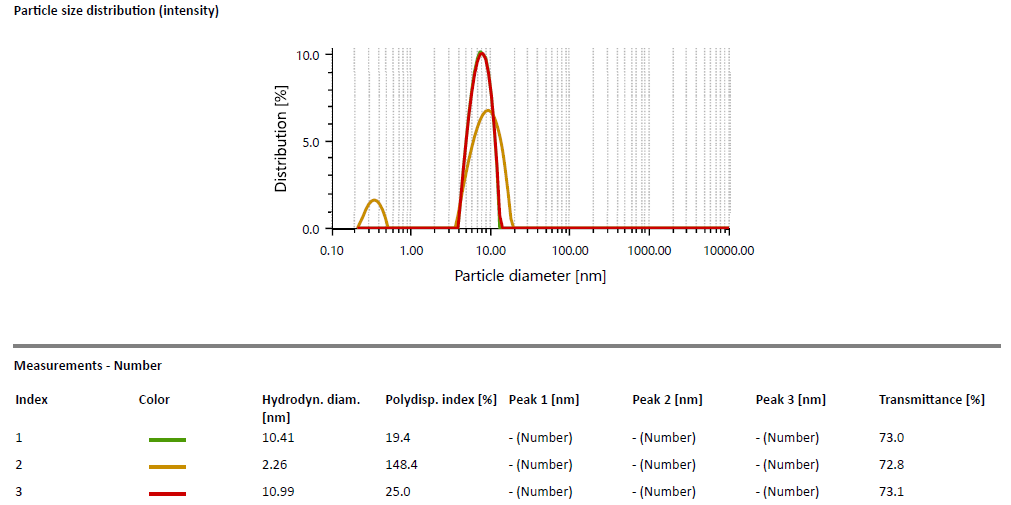


Fig.6 PA-2 Ultrasonicated and filtered


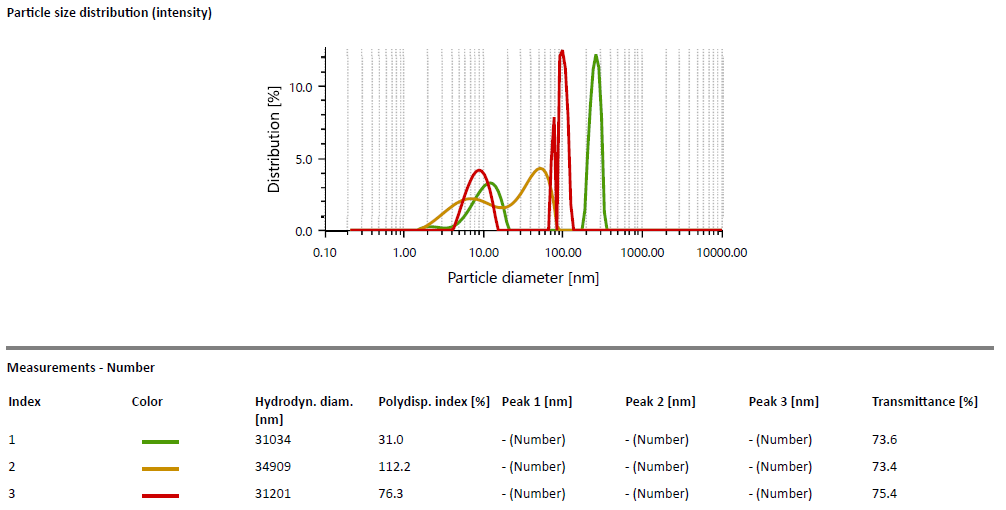


Fig.7 PA-3


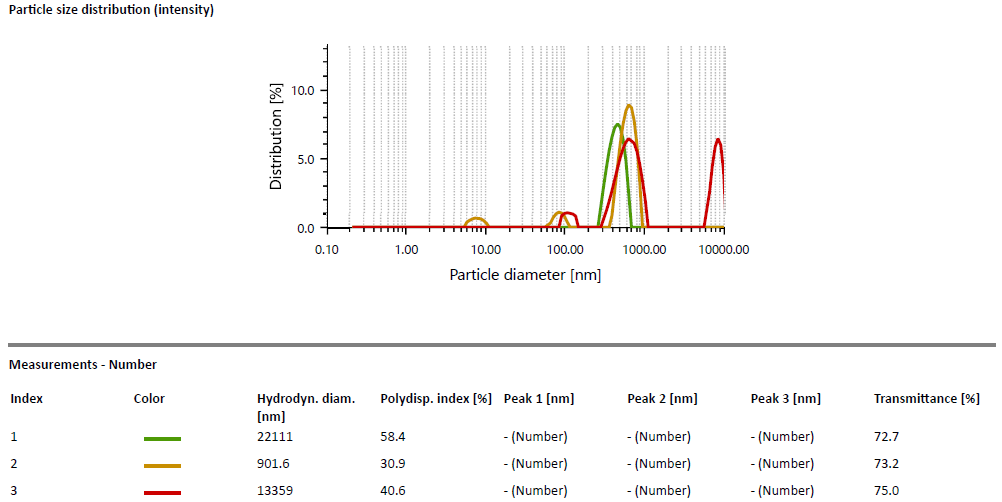


Fig.7 PA-3 Ultrasonicated


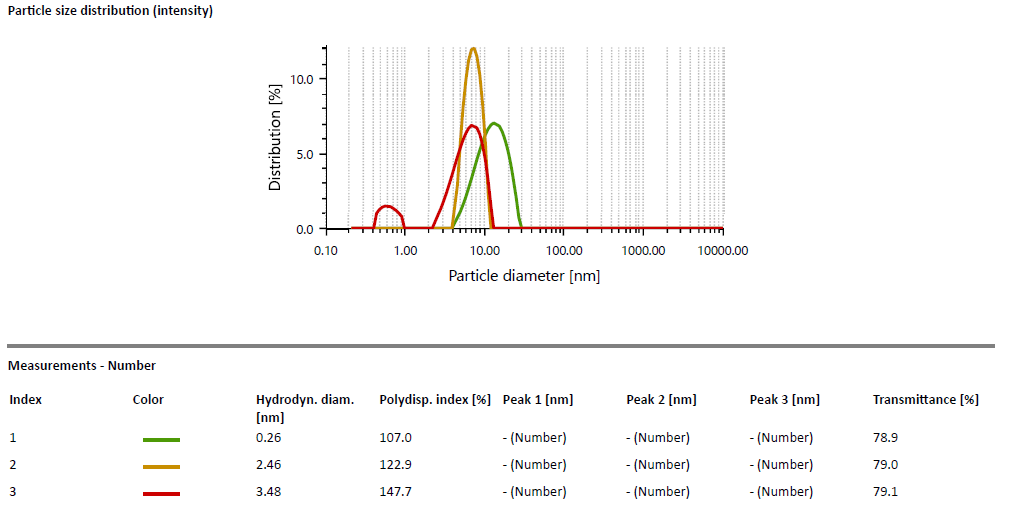


Fig.8 PA-3 Ultrasonicated and filtered


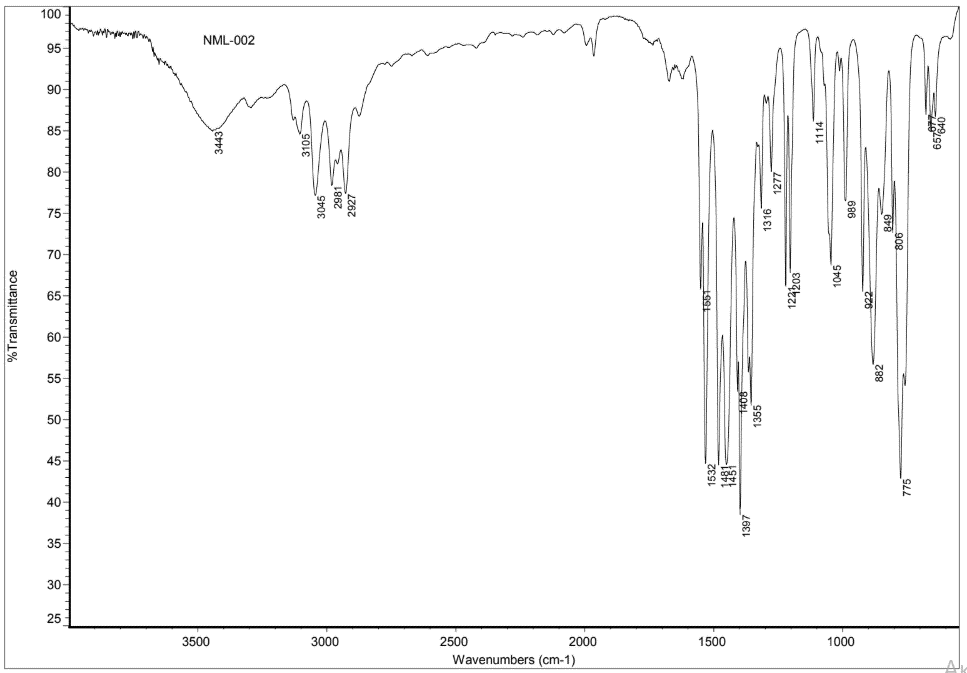


Fig.9 IR spectrum of 1-allenyl-5-methylpyrazole


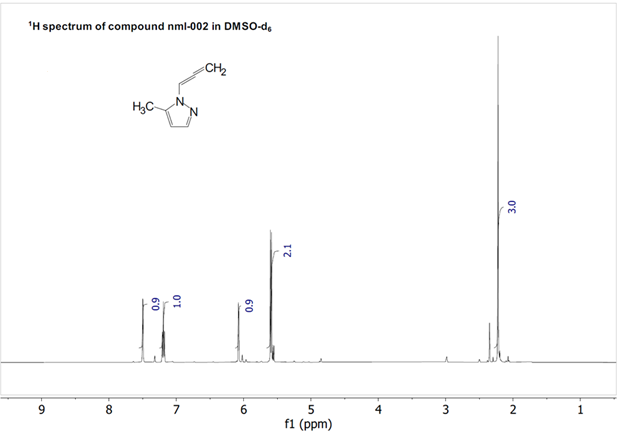


Fig.10 1Н NMR spectrum of 1-allenyl-5-methylpyrazole


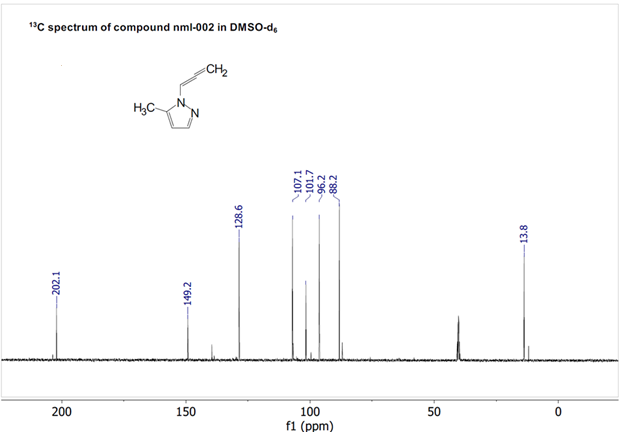


Fig.11 1ЗC NMR spectrum of 1-allenyl-5-methylpyrazole


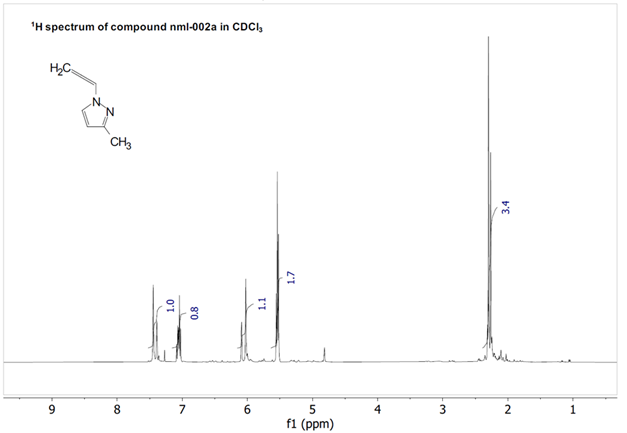


Fig.12 1Н NMR spectrum of 1-allenyl-3-methylpyrazole


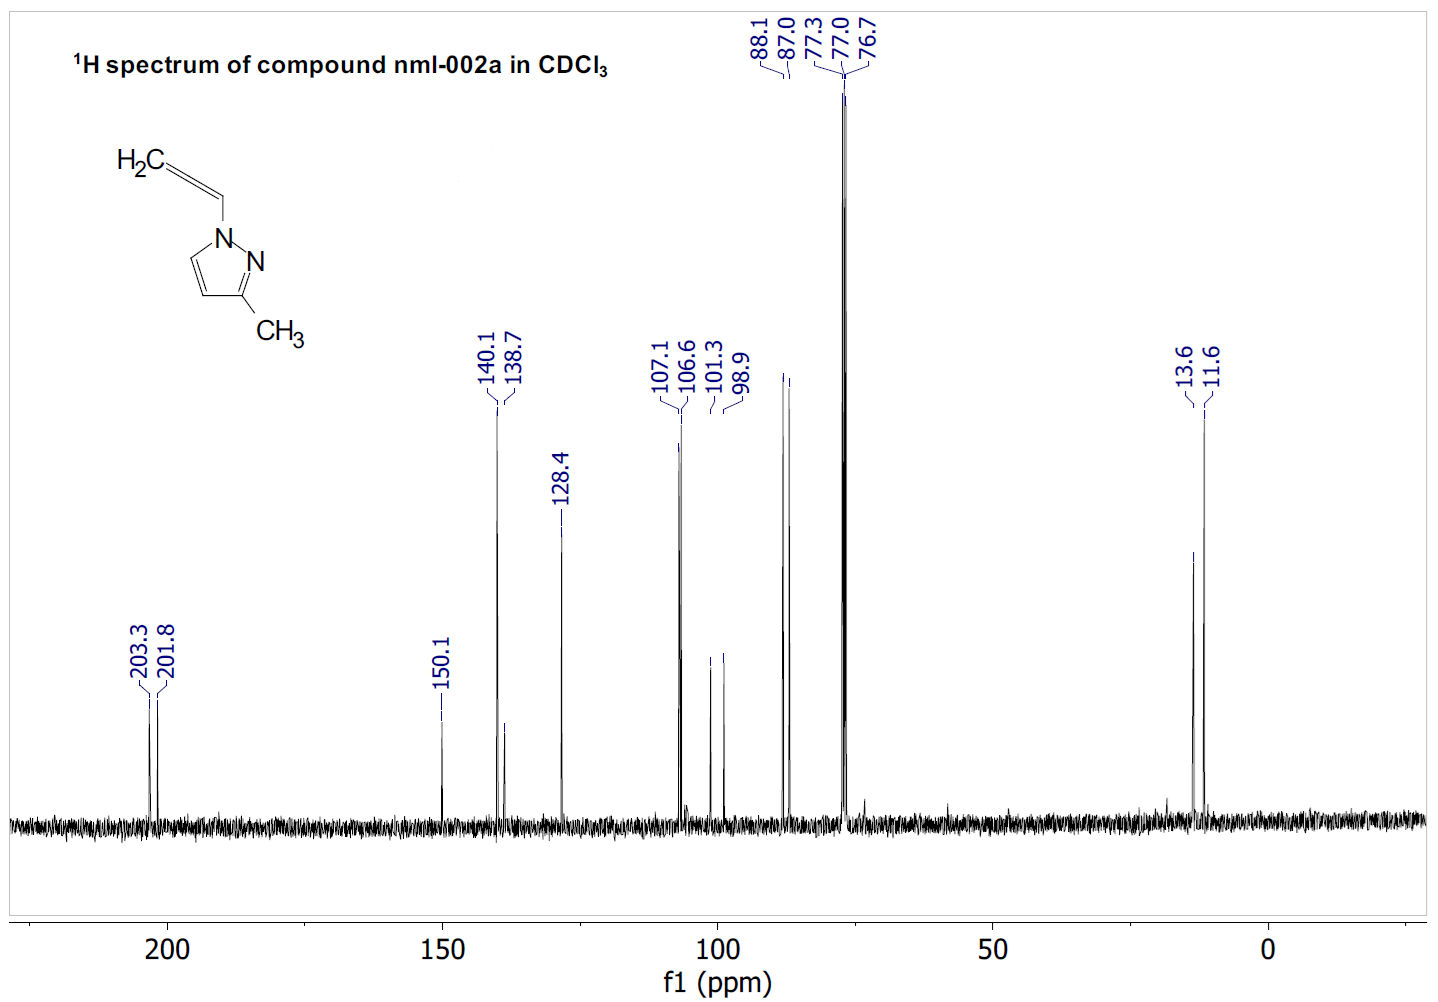


Fig.13 1ЗC NMR spectrum of 1-allenyl-3-methylpyrazole
